# Supplementary material
Source: PubMed Central journal article supplement (PMC4601367)
Supplement: d-71-02021-sup1.pdf [file d-71-02021-sup1.pdf]

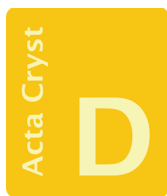

BIOLOGICAL  
CRYSTALLOGRAPHY

**Volume 71 (2015)**

**Supporting information for article:**

**Acoustic vibrations contribute to the diffuse scatter produced by ribosome crystals**

**Yury Polikanov and Peter B. Moore**

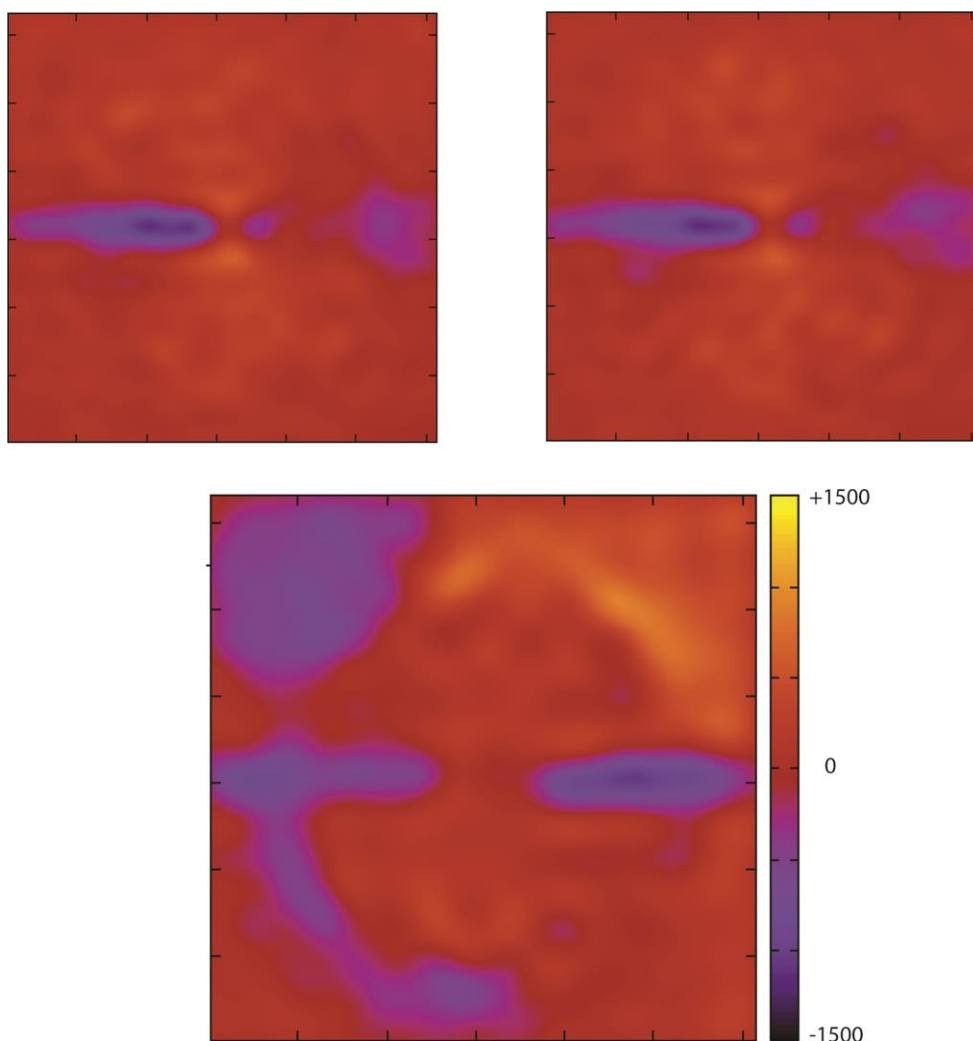

**Figure S1** Low spatial frequency component of the backgrounds obtained from several frames of data. *Upper left:* The image of background from which Figure 1a derives is the sum of Figure 1a and the image of the low spatial frequency components of background shown here. *Upper right:* The low spatial frequency component of the image of background obtained from another frame taken from the data set that yielded Figure 1a. That frame was collected with the crystal rotated by  $18.3^\circ$  relative to the frame that produced Figure 1a. The axis of that rotation corresponds to the horizontal direction in these images. *Lower image:* A similar low spatial frequency image obtained from the frame of data from which Figure 2b was obtained. The intensity scale shown for this image is the same as that of the other two images in this figure.
